# Supplementary material for: Diagnostic and Prognostic Role of WT1 Immunohistochemical Expression in Uterine Carcinoma: A Systematic Review and Meta-Analysis across All Endometrial Carcinoma Histotypes
Source: MDPI journal article supplement (doi:10.3390/diagnostics10090637), 2020-08-26

**Table S1.** Flow diagram of the study selection process.

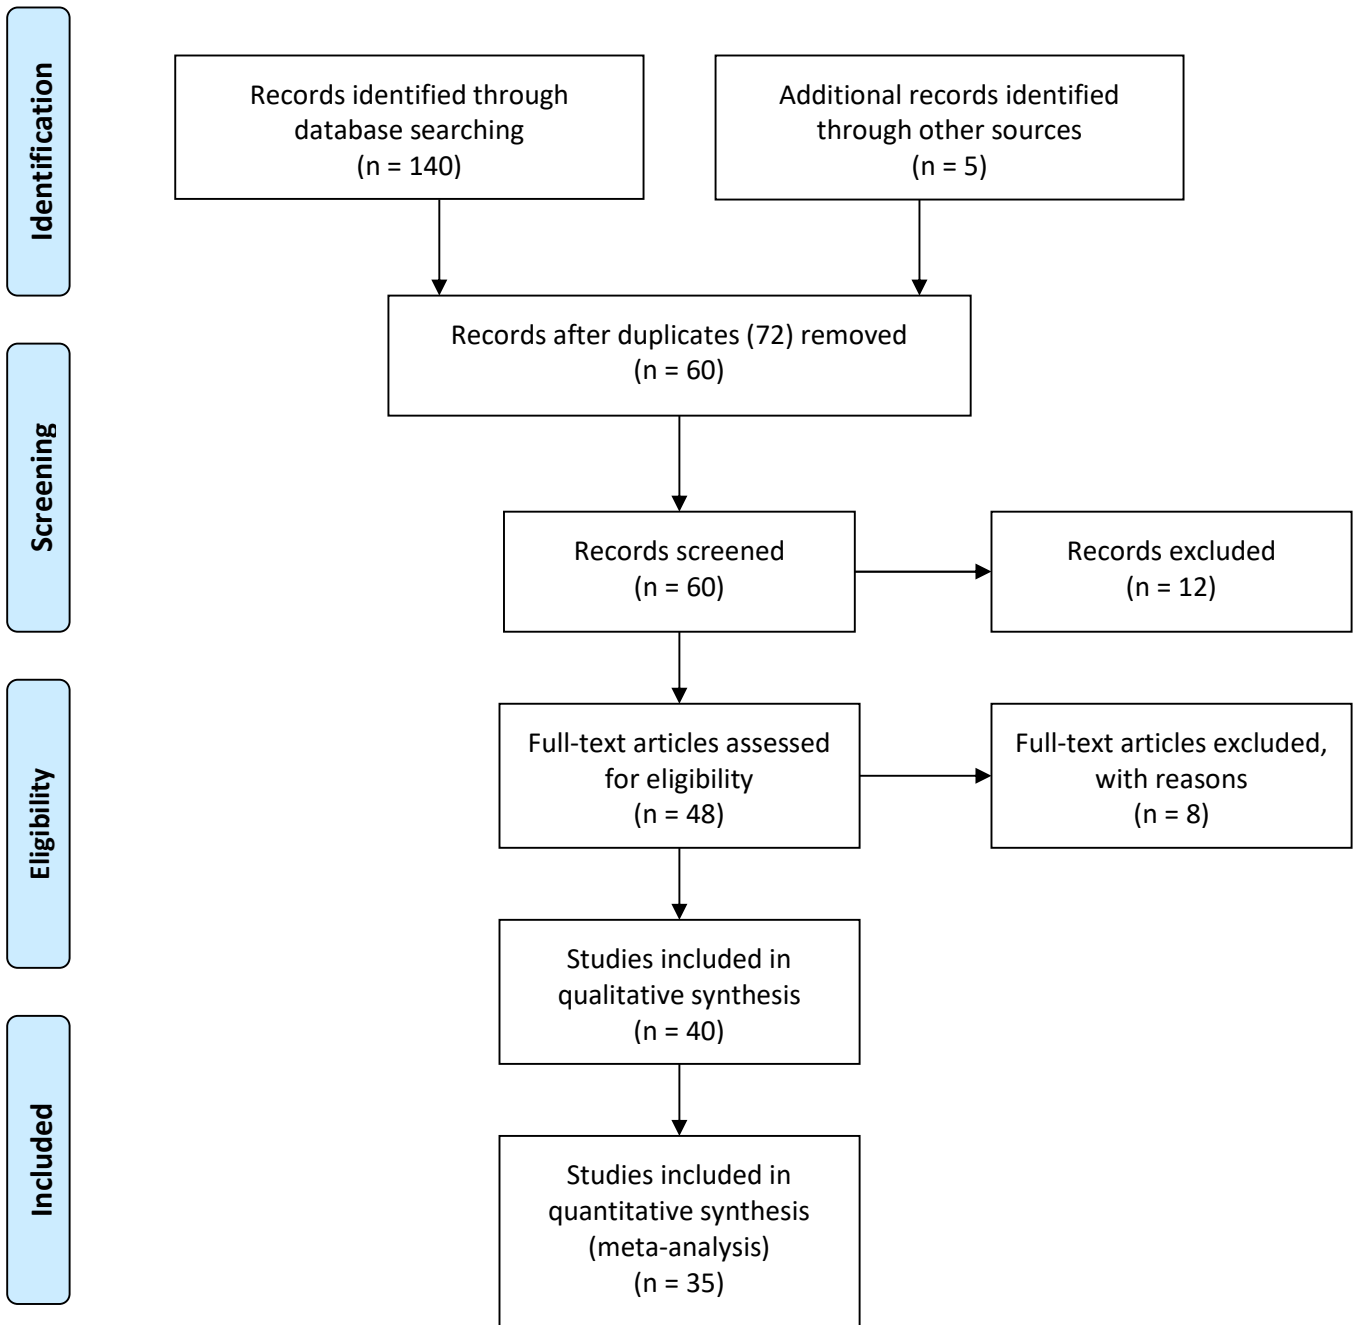

Supplement: s1 [file s1]
